# Supplementary material
Source: publisher figshare collection journal article supplement (https://karger.figshare.com/ndownloader/files/28409790)
Supplement: Supplementary file 1 [file 28409790]

**S. Table 2.** Meta-analysis of AKI incidence among COVID-19 positive patients across different studies.

| **Study** | **Event/Sample size** | **Proportion (%) (95% CI)** | **Random Weight (%)** |
| --- | --- | --- | --- |
| **Aggarwal, S et al., 2020** | 11/16 | 68.75% (41.34% - 88.98%) | 1.55 |
| **Arentz, M et al., 2020** | 4/21 | 19.05% (5.45% - 41.91%) | 1.63 |
| **Argenziano, MG et al., 2020** | 340/1,000 | 34% (31.07% - 37.03%) | 1.96 |
| **Cao, W et al., 2020** | 10/198 | 5.05% (2.45% - 9.09%) | 1.93 |
| **Chan, L et al., 2020** | 1,406/3,235 | 43.46% (41.75% - 45.19%) | 1.97 |
| **Chen, N et al., 2020** | 3/99 | 3.03% (0.63% - 8.6%) | 1.88 |
| **Chen, T et al., 2020a** | 25/203 | 12.32% (8.13% - 17.64%) | 1.93 |
| **Chen, T et al., 2020b** | 30/274 | 10.95% (7.51% - 15.26%) | 1.94 |
| **Cheng, Y et al., 2020** | 36/701 | 5.14% (3.62% - 7.04%) | 1.96 |
| **Cummmings, MJ et al., 2020** | 79/257 | 30.74% (25.16% - 36.77%) | 1.94 |
| **Daqing, H et al., 2020** | 1/168 | 0.6% (0.02% - 3.27%) | 1.92 |
| **Deng, Y et al., 2020** | 20/225 | 8.89% (5.51% - 13.39%) | 1.93 |
| **Derespina, K et al., 2020** | 9/70 | 12.86% (6.05% - 23.01%) | 1.85 |
| **Diao, B et al., 2020** | 23/85 | 27.06% (17.99% - 37.79%) | 1.87 |
| **Du, Y et al., 2020** | 48/85 | 56.47% (45.28% - 67.2%) | 1.87 |
| **Dudoignan, E et al., 2020** | 26/51 | 50.98% (36.6% - 65.25%) | 1.81 |
| **Fisher, M et al., 2020** | 3,077/5,407 | 56.91% (55.58% - 58.23%) | 1.97 |
| **Guan, W et al., 2020** | 6/1,099 | 0.55% (0.2% - 1.18%) | 1.96 |
| **Gupte, S et al., 2020** | 948/2,215 | 42.8% (40.73% - 44.89%) | 1.97 |
| **Guqin, Z et al., 2020** | 10/221 | 4.53% (2.19% - 8.16%) | 1.93 |
| **Hong, KS et al., 2020** | 9/98 | 9.18% (4.29% - 16.72%) | 1.88 |
| **Huang, C et al., 2020** | 3/41 | 7.32% (1.54% - 19.93%) | 1.78 |
| **Jamie, H et al., 2020** | 1,993/5,449 | 36.58% (35.3% - 37.87%) | 1.97 |
| **Jiahao, Z et al., 2020** | 37/394 | 9.39% (6.7% - 12.71%) | 1.95 |
| **Li, X et al., 2020** | 12/25 | 48% (27.8% - 68.69%) | 1.67 |
| **Ling, H et al., 2020** | 17/323 | 5.26% (3.1% - 8.29%) | 1.94 |
| **Luo, X et al., 2020** | 57/403 | 14.14% (10.89% - 17.93%) | 1.95 |
| **Muner, M et al., 2020** | 161/575 | 28% (24.36% - 31.86%) | 1.95 |
| **Na, KR et al., 2020** | 3/68 | 4.41% (0.92% - 12.36%) | 1.85 |
| **Pei, G et al., 2020** | 22/467 | 4.71% (2.98% - 7.05%) | 1.95 |
| **Pelayo, J et al., 2020** | 110/223 | 49.33% (42.59% - 56.08%) | 1.93 |
| **Qiao, S et al., 2020** | 24/101 | 23.76% (15.86% - 33.26%) | 1.89 |
| **Qingxian, C et al., 2020** | 17/298 | 5.71% (3.36% - 8.98%) | 1.94 |
| **Richardson, S et al., 2020** | 523/2,351 | 22.25% (20.58% - 23.98%) | 1.97 |
| **Ruan, Q et al., 2020** | 23/150 | 15.33% (9.98% - 22.11%) | 1.91 |
| **Ruben, S et al., 2020** | 57/71 | 80.28% (69.14% - 88.78%) | 1.85 |
| **Su, H et al., 2020** | 9/26 | 34.62% (17.21% - 55.67%) | 1.68 |
| **Wang, D et al., 2020a** | 14/107 | 13.08% (7.34% - 20.98%) | 1.91 |
| **Wang, D et al., 2020b** | 5/138 | 3.62% (1.19% - 8.25%) | 1.89 |
| **Wang, L et al., 2020** | 0/116 | 0.00% (0.00% - 3.13%) | 1.90 |
| **Wu, T et al., 2020** | 9/201 | 4.48% (2.07% - 8.33%) | 1.93 |
| **Xiao, G et al., 2020** | 55/287 | 19.16% (14.78% - 24.2%) | 1.94 |
| **Xin-Ying, Z et al., 2020** | 5/91 | 5.5% (1.81% - 12.36%) | 1.88 |
| **Xu, J et al., 2020** | 119/239 | 49.79% (43.28% - 56.31%) | 1.93 |
| **Xu, S et al., 2020** | 56/355 | 15.78% (12.14% - 19.99%) | 1.95 |
| **Xu, Y et al., 2020** | 7/45 | 15.56% (6.49% - 29.46%) | 1.79 |
| **Yang, F et al., 2020** | 14/92 | 15.22% (8.58% - 24.21%) | 1.88 |
| **Yang, X et al., 2020** | 15/52 | 28.85% (17.13% - 43.08%) | 1.81 |
| **Yi, Z et al., 2020** | 7/34 | 20.59% (8.7% - 37.9%) | 1.74 |
| **Yu, Y et al., 2020** | 57/226 | 25.22% (19.7% - 31.41%) | 1.93 |
| **Zhang, B et al., 2020** | 26/82 | 31.71% (21.87% - 42.92%) | 1.87 |
| **Zhen, L et al., 2020** | 55/193 | 28.5% (22.25% - 35.42%) | 1.92 |
| **Zhou, F et al., 2020** | 28/191 | 14.66% (9.97% - 20.49%) | 1.92 |
| **Total (random effects)** | 9,661/29,142 | 19.45% (14.63% - 24.77%) | 100 |
